# Supplementary material for: Gymnosperm glandular trichomes: expanded dimensions of the conifer terpenoid defense system
Source: PubMed Central journal article supplement (PMC7385631; doi:10.1038/s41598-020-69373-5), 2020-07-27
Supplement: 41598_2020_69373_MOESM1_ESM.pdf [file 41598_2020_69373_MOESM1_ESM.pdf]

Supplementary File

**Gymnosperm Glandular Trichomes:  
Expanded Dimensions of the Conifer Terpenoid Defense System**

Jose M Celedon<sup>1</sup>, Justin G. A. Whitehill<sup>1</sup>, Lufiani L. Madilao<sup>1</sup>, and Joerg Bohlmann<sup>1\*</sup>

<sup>1</sup>Michael Smith Laboratories, University of British Columbia, Vancouver, BC V6T 1Z4, Canada

\*corresponding author: E-mail: [bohlmann@msl.ubc.ca](mailto:bohlmann@msl.ubc.ca)

**Table S1:** Terpenes identified by SPME GC-MS in spruce GT

| Peak No | Compound               | LRI <sub>lit</sub> <sup>a</sup> | LRI <sub>exp</sub> <sup>b</sup> | LRI <sub>exp</sub> <sup>c</sup> | Identification |
|---------|------------------------|---------------------------------|---------------------------------|---------------------------------|----------------|
| 1       | $\alpha$ -Thujene      | 924                             | 926                             | -                               | 1,2            |
| 2       | (-)- $\alpha$ -Pinene  | 932                             | 934                             | 991                             | 1,2,3          |
| 3       | Camphene               | 946                             | 951                             | 1025                            | 1,2            |
| 4       | Sabinene               | 969                             | 974                             | 1081                            | 1,2,3          |
| 5       | (-)- $\beta$ -Pinene   | 974                             | 979                             | 1067                            | 1,2            |
| 6       | $\beta$ -Myrcene       | 988                             | 989                             | 1124                            | 1,2,3          |
| 7       | $\alpha$ -Phellandrene | 1002                            | 1007                            | 1126                            | 1,2,3          |
| 8       | $\delta$ -3-Carene     | 1008                            | 1010                            | 1111                            | 1,2,3          |
| 9       | $\alpha$ -Terpinene    | 1014                            | 1018                            | 1140                            | 1,2,3          |
| 10      | $\beta$ -Phellandrene  | 1025                            | 1032                            | 1069                            | 1,2,3          |
| 11      | $\gamma$ -Terpinene    | 1054                            | 1059                            | 1203                            | 1,2            |
| 12      | Terpinolene            | 1086                            | 1087                            | 1239                            | 1,2,3          |
| 13      | Linalool               | 1095                            | 1100                            | 1491                            | 1,2            |
| 14      | Terpinen-4-ol          | 1174                            | 1184                            | 1553                            | 1,2            |
| 15      | $\gamma$ -Terpineol    | 1199                            | 1198                            | 1643                            | 1,2            |
| 16      | Bornyl acetate         | 1284                            | 1287                            | 1529                            | 1,2            |
| 17      | $\alpha$ -Cubebene     | 1345                            | 1351                            | 1431                            | 1,2            |
| 18      | $\alpha$ -Copaene      | 1374                            | 1374                            | 1466                            | 1,2            |
| 19      | Unknown                | -                               | 1381                            | -                               | -              |
| 20      | $\beta$ -Cubebene      | 1387                            | 1388                            | 1560                            | 1,2            |
| 21      | Unknown                | -                               | 1392                            | -                               | -              |
| 22      | Unknown                | -                               | 1398                            | -                               | -              |
| 23      | Unknown                | -                               | 1429                            | -                               | -              |
| 24      | Aromadendrene          | 1439                            | 1441                            | 1675                            | 1,2            |
| 25      | Unknown                | -                               | 1457                            | -                               | -              |
| 26      | Unknown                | -                               | 1460                            | -                               | -              |
| 27      | Unknown                | -                               | 1473                            | -                               | -              |
| 28      | $\alpha$ -Amorphene    | 1483                            | 1483                            | 1682                            | 1,2            |
| 29      | Unknown                | -                               | 1491                            | -                               | -              |
| 30      | Unknown                | -                               | 1502                            | -                               | -              |
| 31      | $\gamma$ -Cadinene     | 1513                            | 1511                            | 1710                            | 1,2            |
| 32      | $\delta$ -Cadinene     | 1522                            | 1526                            | 1705                            | 1,2            |
| 33      | Unknown                | -                               | 1546                            | -                               | -              |
| 34      | Unknown                | -                               | 1655                            | -                               | -              |
| 35      | $\alpha$ -Cadinol      | 1652                            | 1671                            | 1891                            | 1,2            |

Peak No: peak number according to retention times on an HP-5 column as shown in **Fig 5**.

<sup>a</sup> LRI<sub>lit</sub>: Retention indexes extracted from (Adams et al., 2007).

<sup>b</sup> LRI<sub>exp</sub>: Determined linear retention index against mixture of n-alkanes (C8-C31) on HP-5 column.

<sup>c</sup> LRI<sub>exp</sub>: Determined linear retention index against mixture of n-alkanes (C8-C31) on a DB-wax column.

Identification by: (1) match to linear retention index reported in the literature, (2) comparison with reference mass spectra from databases of the National Institute of Standards and Technology (NIST) MS library searches (Wiley W9N08L) and relevant literature; and (3) comparison with retention time and mass spectra of authentic analytical standards.

Figure S1

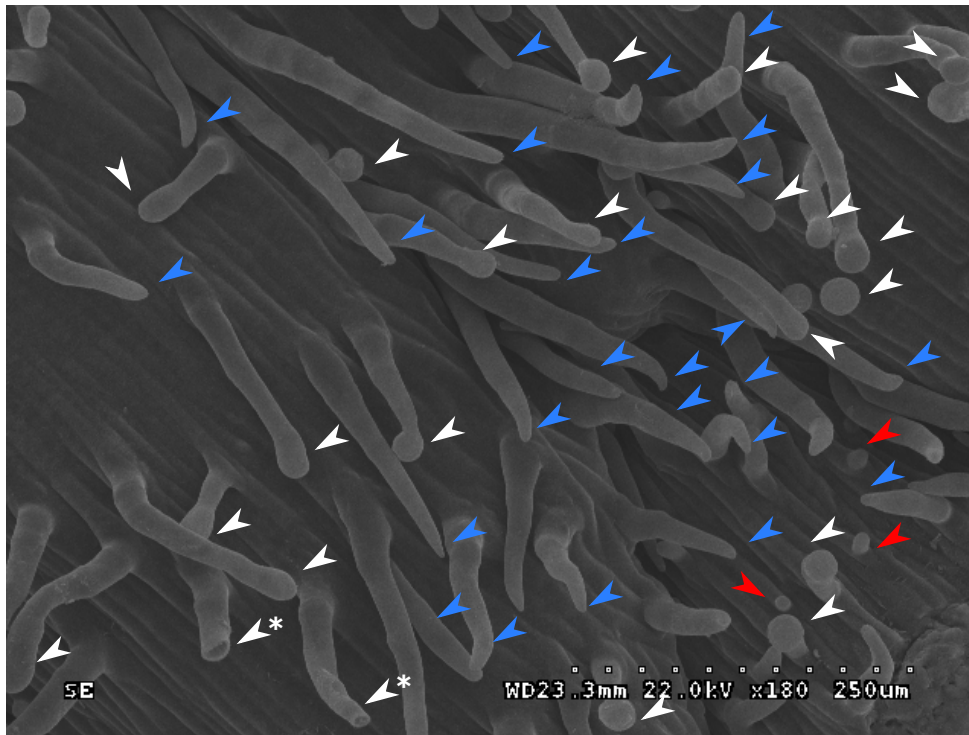

Figure S1: SEM image of glandular and non-glandular type trichomes in PG29 stems. Heads of glandular-type trichomes are indicated by white arrows, non-glandular type trichome tips are indicated by blue arrows and trichomes at early development stages are indicated by red arrows.

Figure S2

a

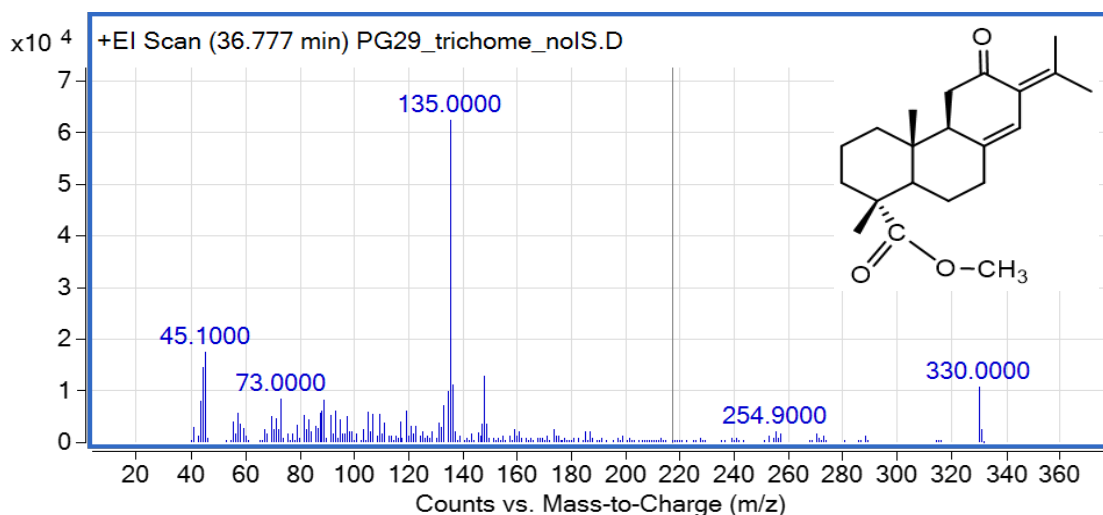

b

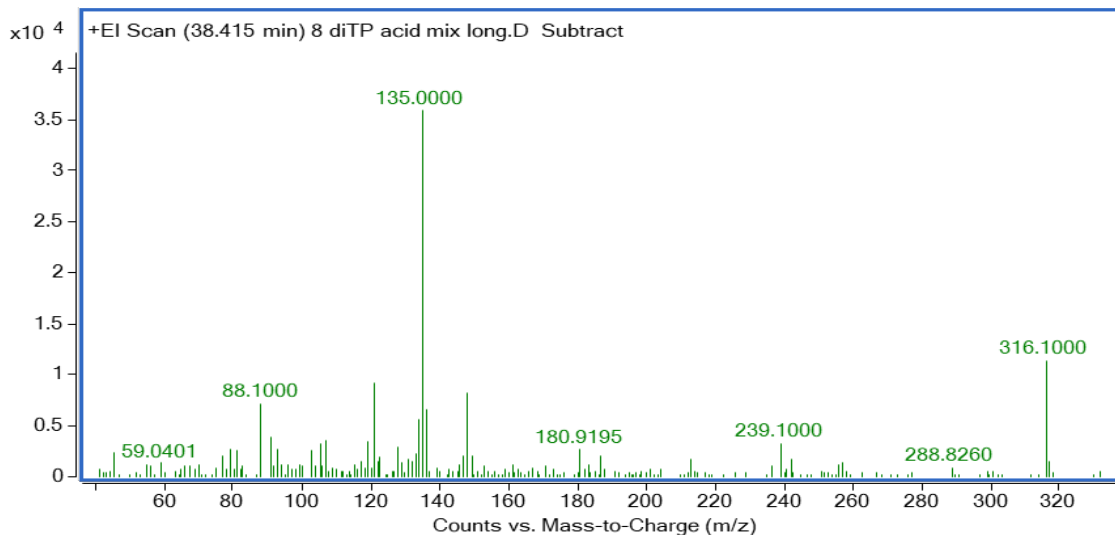

**Figure S2.** The mass spectra of one unknown compound with m/z 330 has a characteristic ion 135 similar to Neobietic acid. The mass spectra of one of the unknown compounds with m/z 330 was obtained from underivatized extracts and shown to have a dominant ion of mass 135 (a). The inset in (a) shows a hypothetical diterpene structure with a natural methyl ester group and an additional oxygen which would result in a compound with m/z of 330. For comparison, the mass spectra of derivatized Neobietic acid is shown in (b).

Figure S3

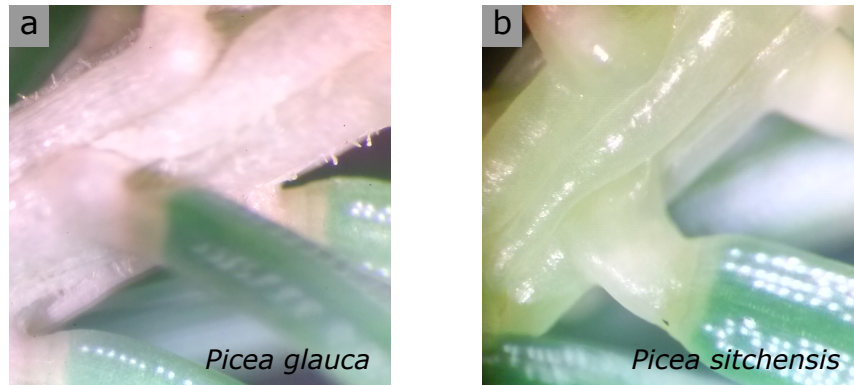

**Figure S3.** Trichomes are sparsely found in *Picea glauca* stems (a) and completely absent in *Picea sitchensis* stems (b).
